1 **Information content of cheek and lip colour in relation to the timing of ovulation in women**

2 Lucie Rigaiill <sup>1</sup>

3 <sup>1</sup> Kyoto University Primate Research Institute KUPRI, Inuyama, Japan

4 [lucie.rigaiill@gmail.com](mailto:lucie.rigaiill@gmail.com)

5

6 **Abstract**

7 Various animal species have evolved a sexual communication system with female displaying  
8 and male discriminating information about the timing of ovulation through sexual signals. More  
9 research is now investigating the potential ovulatory signalling function of female red skin  
10 colour in human and non-human primates. However, to date it is still challenging to draft  
11 satisfying hypotheses of the evolution and function of female red skin colour, due to  
12 methodological discrepancies between human and non-human primate studies. The present  
13 study used a within-individual design and objective methods to analyse the relationship  
14 between fine-scale variation in cheek and lip colour (luminance and redness) and the estimated  
15 day of ovulation in 15 cycling women. Lip, but not cheek, colour, appeared to contain  
16 information about the timing of ovulation, with lips getting darker around the timing of  
17 ovulation. This study adds to the growing evidence that female red skin colour may play a role  
18 in sexual signalling in human and non-human primates but also underlines variation in trait  
19 forms and functions at the species-level.

20

21 **Keywords:** Red skin colour, Information content, Ovulatory signalling, Lips, Humans, Primates

## 22 **Introduction**

23 Do females display visual information about their reproductive status that can modulate mate  
24 attraction and mating strategies? This question is central to sexual selection theory. The number  
25 of possible offspring by females is constrained by physiological factors such as menstrual  
26 cyclicity, gestation and post-partum amenorrhea, and reproductive senescence. Reproduction is  
27 usually more costly for females due to the production of larger gametes, extended maternal  
28 care, and male monopolization [1,2]. Thus, in several species, females appear to have evolved  
29 traits which are attractive to males and can act as probabilistic signals of ovulation to maximize  
30 reproduction while balancing its associated costs. Across human and non-human primates  
31 (hereafter, primates), there is evidence that male behaviour is modulated by female traits,  
32 suggesting common evolutionary pathways and underlying mechanisms for sexual signalling  
33 [3,4].

34 Among the different female traits, there is a growing interest in the potential role of red  
35 skin colour in primate sexual communication. Intra-cycle variation in oestrogens induces  
36 ovulation and also affects some chromatic (redness) and achromatic (luminance) parameters of  
37 skin colour [5,6]. Circulating oestrogens bind to receptors in the skin, causing an increase in  
38 blood flow and consequently a decrease in the perceived skin luminance (i.e., darkening of the  
39 skin) [7,8]. Increase in blood flow can modulate the ratio of oxygenated/deoxygenated blood in  
40 the skin vessels which may influence perceived redness. Primate studies provided evidence that  
41 facial skin colour varies across the cycle in mandrills [9], informs about the probability of  
42 ovulation in rhesus macaques [10,11], and simultaneously conceals ovulation and advertises  
43 pregnancy in Japanese macaques [12,13]. Moreover, this colourful trait appears to be attractive  
44 to males suggesting a role in mate attraction, at least in macaques [14].

45 Skin and lip colour also correlate with female attractiveness in human [15–18]. Skin  
46 colour may thus be involved into human mate attraction, although the colour of the stimuli was

47 artificially manipulated in these studies which may impair the ecological validity of the results.  
48 Studies of the potential signalling function of red skin colour in women yielded mixed results.  
49 Oberzaucher et al. [19] described that cheeks were redder around ovulation compared to the  
50 end of the cycle while Samson et al [20] did not replicate these findings. Recently, Burris et al.  
51 [21] found no intra-cycle variation in cheek colour. Interpretation of these findings is  
52 constrained by some methodological limitations. While most studies used photography to  
53 analyse skin colour, which provides accurate measurements, they did not always correct  
54 lighting conditions across photography sessions using colour standards that may have altered  
55 measurements [22,23]. Human studies usually rely on a restricted data set to assess intra-cycle  
56 difference: e.g. 2 samples from mid and late cycle, which underestimate or overestimate cycle  
57 effects, with the exception of [21]. Finally, human studies often failed to confirm ovulation with  
58 sex hormones profiles (with the exception of [21]) especially when studying perception of intra-  
59 cycle variation. Taken together, these methodological limitations constrain our understanding  
60 of the potential role of female red skin colour in sexual signalling in humans.

61 To determine if women display a colourful trait that may play a role in ovulatory  
62 signalling, there is a fundamental need for studies of the relationship between fine-scale  
63 variation in trait expression and the probability of ovulation. Such studies would benefit from  
64 objective and quantitative methods, inspired by primate studies, using standardized  
65 photography, regular biological sampling, and hormonal estimation of the ovulation date [23–  
66 26]. Following this premise, this study aims at investigating whether cheek and lip colour  
67 contain information about intra-cycle variation in the probability of ovulation in women. If  
68 cheek or lip colour is related to the timing of ovulation within a cycle, I predict that cheeks or  
69 lips will be darker/redder around this timing.

## 70 **Methods**

### 71 **Ethic statement**

72 This study was approved by the Human Research Ethics Committee of Kyoto University  
73 Primate Research Institute (KUPRI, project number 2017-13). All participants signed a written  
74 agreement concerning their participation in the study, confidentiality, and the use of their  
75 photographs for research purposes and illustrations. Participants received a financial  
76 compensation in return for their participation (5,000 JPY ~ 45 USD).

77

### 78 **Participants**

79 In total, 18 women participated in the study (mean age =  $28.3 \pm \text{SD } 4.3$  years, “Asian” = 11,  
80 “Caucasian” = 7, additional information on the supplementary material). All participants were  
81 naturally cycling and not taking hormonal contraceptives for at least 3 months. I collected  
82 digital photographs and saliva samples every two days, excluding weekends and national  
83 holidays, for the duration of one complete menstrual cycle (i.e., from the beginning of their  
84 menstruations until the next ones) between September and June 2018-19, to limit the effect of  
85 tanning. Sampling occurred at a fixed time of the day for each participant to control for possible  
86 diurnal variation in sex hormones concentration [27]. I collected a total of 204 photographs and  
87 saliva samples (mean per participant =  $11.3 \pm \text{SD } 1.5$ , range = 8-13).

88

### 89 **Assessment of cheek and lip colour**

90 Participants removed face and lip make-up a minimum of 30 min before sampling. A single  
91 female experimenter (LR) photographed the participants, as the sex of the photographer can  
92 influence participant facial temperature and potentially skin colour [28]. Sampling was  
93 conducted in a unique location, i.e., an office room with closed curtains, ceiling lights turned  
94 on, and a constant  $24^{\circ} \text{C}$  temperature. Participants sat in front of a beige background and

95 adopted a neutral expression. The camera was placed 2m from the participant's chair and held at  
96 the same height of the participant's face. The experimenter used a Nikon 5000D camera with a  
97 12.3 megapixel CMOS sensor and a Nikon AF-S NIKKOR 18-55mm f/3.5-5.6G lens.  
98 Photographs were collected in NEF format, i.e., Nikon's RAW, with the flash disabled, the  
99 shutter speed and aperture size determined automatically by the camera, and a 55mm focal to  
100 limit distortion [29]. The experimenter manually set the white balance using a X-Rite White  
101 Balance Card (GretagMacbeth ColorChecker) and a Gretag X-Rite Color Checker (colour  
102 standards). This technique standardizes photographs such that colour measurements are  
103 comparable across all photographs [23–25]. Photographs were converted to uncompressed 16-  
104 bit TIFF files. Cheek colour was measured from a pair of points located on the area described  
105 in [21]. Lip colour was measured from the whole lip skin (supplementary material, Figure S1).  
106 CIELAB values were extracted using Colourworker software (Chrometics Ltd. available at:  
107 <http://www.colourworker.com/>) which provided luminance ( $L^*$ ) and red-green ratio ( $a^*$ ,  
108 hereafter redness) values calculated from the estimated reflectance spectrum according to the  
109 standard CIE (Commission Internationale de l'Éclairage) equations [30].

110

### 111 **Determination of the estimated ovulation**

112 Participants followed the sampling guideline recommended by Salimetrics (Salimetrics, LLC,  
113 USA). Samples were collected during the photo session, labelled and stored within 15 min at -  
114 80°C until analyses at KUPRI. Saliva samples were analysed for oestradiol ( $17\beta$ -estradiol) and  
115 progesterone (4-pregnenone-3,20-dione) using Salimetrics enzyme immunoassays kits. The  
116 oestradiol assay had a sensitivity of 0.1 pg/ml with an intra-assay coefficient of variation (CV)  
117 of 6.2 % and inter-assay CV of 10.8 %. The progesterone assay had a sensitivity of 5 pg/ml  
118 with an intra-assay CV of 6.6 % and inter-assay CV of 9.7 %.

119 The onset of the luteal phase was defined as the sample with a progesterone  
120 concentration at least 2 standard deviations greater than the mean of the 2-3 preceding baseline  
121 values [26]. Ovulation was considered to have occurred when a mid-cycle peak of oestradiol  
122 was detected around the onset of the luteal phase. Because sampling occurred every 2-3 days,  
123 I considered the day of peak oestradiol as the most likely day of ovulation and labelled it as *day*  
124 *0*. The day directly preceding the estimated ovulation day was labelled as *day -1*, the day  
125 directly following it as *day +1*, and so on. Ovulation could not be determined (i.e., abnormal  
126 hormone variations) for 3 out of the 18 participants.

127

## 128 **Statistical analyses**

129 I used photographs of 15 participants showing ovulatory cycles to analyse intra-cycle variation  
130 in cheek and lip luminance and redness (N = 165 photographs, mean per participant =  $11.0 \pm$   
131 SD 1.4, range = 8-13).

132 This study tests for a possible quadratic effect of the days relative to ovulation on cheek  
133 and lip colour: higher effect toward the estimated ovulation and lower effect toward the  
134 beginning and end of the cycle. I thus constructed general linear mixed-effects models (LMMs)  
135 for cheek and lip colour (luminance and redness respectively) which included the linear (DAY)  
136 and quadratic (DAY<sup>2</sup>) effects of the days relative to the estimated ovulation as fixed effects,  
137 and fitted by maximum likelihood using lme4 [31] and lmerTest [32] packages in R version  
138 3.6.0 [33]. Inspection of the cumulative distribution functions revealed good fits to the normal  
139 distribution for luminance and to the lognormal distribution for redness. Prior to modelling, the  
140 days relative to the estimated ovulation were standardized to mean = 0 and SD = 1 to improve  
141 model performance and interpretability [34]. On one hand, we can expect that the relationship  
142 between the timing of ovulation and colour would be similar across participants; I thus  
143 constructed random intercept models (RIM) with random intercepts for participant identity. On

144 the other hand, this relationship may vary between participants; I thus constructed uncorrelated  
145 random slope models (RSM) with random slopes for the linear and quadratic terms. I also  
146 constructed the respective RIM and RSM null models in which the predictor variables were  
147 removed but the random effect structure was maintained. This resulted in 4 candidate models  
148 for each colour/skin combination: RIM-full, RIM-null, RSM-full, and RSM-null. I ensured that  
149 all relevant model assumptions were met by visually inspecting histograms of the residuals and  
150 plots of residuals against fitted values. I used an information-theory approach to objectively  
151 compare and rank the 4 candidate models in terms of how well they fitted the existing data thus  
152 assessing the likelihood that one or more models among the candidates is/are best supported by  
153 the data [35,36]. I used the function `model.sel` of the MuMIn package [37] to rank models based  
154 on the Akaike's information criterion corrected for small sample size (AICc values). I reported  
155 the weight of the models which indicates to what extent one candidate model is more likely  
156 than another to provide a reasonable explanation of the variance in the data. I extracted weighted  
157 parameter estimates ( $\beta$ ), standard errors (s.e.), and 95% confidence intervals (95% CIs) of  
158 model intercepts and predictors from conditional averaging of the 4 candidate models (function  
159 `model.avg`).

160

## 161 **Results**

162 RIMs generally performed better than their respective RSMs (Table 1). Concerning cheek  
163 colour, the RIM-null for luminance had a weight of 0.75, while the RIM-full for redness had a  
164 weight of 0.51 (vs. 0.37 for its RIM-null), suggesting some weak evidence for variation in cheek  
165 redness only (Table 1). Concerning lip colour, the RIM-full for luminance had a weight of 0.53  
166 (vs. 0.31 for RIM-null) and the RIM-null for redness had a weight of 0.50 (vs. 0.37 for its RIM-  
167 null), suggesting some weak evidence for variation in lip luminance only (Table 1). The timing  
168 of ovulation explained little to none of the variance in cheek redness (Table 2, Figure 1). Lip

169 luminance varied according to the timing of ovulation with lips being darker around ovulation  
 170 ( $\beta = 0.21 \pm 0.09$  s.e., 95% CI = 0.03; 0.39, Table 2, Figure 2).

171  
 172 **Table 1.** Characteristics of candidate models for cheek and lip redness and luminance. AICc:  
 173 corrected Akaike's information criterion, weight: model probabilities

|                        | <b>logLik</b> | <b>AICc</b> | <b>weight</b> |                      | <b>logLik</b> | <b>AICc</b> | <b>weight</b> |
|------------------------|---------------|-------------|---------------|----------------------|---------------|-------------|---------------|
| <i>Cheek luminance</i> |               |             |               | <i>Cheek redness</i> |               |             |               |
| RIM - null             | -247.751      | 501.7       | 0.75          | RIM - full           | 279.799       | -549.2      | 0.51          |
| RIM - full             | -247.292      | 505.0       | 0.14          | RIM - null           | 277.351       | -548.6      | 0.37          |
| RSM - null             | -247.751      | 505.9       | 0.09          | RSM - full           | 279.799       | -544.9      | 0.06          |
| RSM - full             | -247.292      | 509.3       | 0.02          | RSM - null           | 277.621       | -544.9      | 0.06          |
| <i>Lip luminance</i>   |               |             |               | <i>Lip redness</i>   |               |             |               |
| RIM - full             | -272.607      | 555.6       | 0.53          | RIM-null             | 221.984       | -437.8      | 0.60          |
| RIM - null             | -275.332      | 556.8       | 0.30          | RIM-full             | 223.354       | -436.3      | 0.29          |
| RSM - null             | -274.316      | 559.0       | 0.10          | RSM-null             | 222.055       | -433.7      | 0.08          |
| RSM - full             | -272.345      | 559.4       | 0.08          | RSM-full             | 223.356       | -432.0      | 0.03          |

174  
 175 **Table 2.** Model averaged parameters estimates ( $\beta$ )  $\pm$  standard errors (s.e.) and confidence  
 176 intervals (95% CIs) from conditional averaging of all candidate models. Result for which CI  
 177 does not include zero are presented in bold.

|                        | <b>Intercept</b>                         | <b>DAY</b>                     | <b>DAY<sup>2</sup></b>                |
|------------------------|------------------------------------------|--------------------------------|---------------------------------------|
| <i>Cheek luminance</i> | 26.99 $\pm$ 0.50 ( <b>26.01; 27.97</b> ) | -0.06 $\pm$ 0.07 (-0.21; 0.08) | 0.03 $\pm$ 0.07 (-0.11; 0.17)         |
| <i>Cheek redness</i>   | 2.05 $\pm$ 0.02 ( <b>2.01; 2.10</b> )    | 0.00 $\pm$ 0.00 (-0.00; 0.01)  | 0.01 $\pm$ 0.00 (-0.00; 0.01)         |
| <i>Lip luminance</i>   | 20.77 $\pm$ 0.32 ( <b>20.13; 21.40</b> ) | 0.01 $\pm$ 0.09 (-0.18; 0.19)  | 0.21 $\pm$ 0.09 ( <b>0.03; 0.39</b> ) |
| <i>Lip redness</i>     | 2.20 $\pm$ 0.03 ( <b>2.14; 2.27</b> )    | 0.01 $\pm$ 0.00 (-0.00; 0.01)  | 0.00 $\pm$ 0.00 (-0.00; 0.01)         |

178  
 179 **Figure 1.** Relationship between cheek (a) luminance and (b) redness and the days relative to  
 180 the estimated ovulation. Raw data are presented as grey circle. The red line presents the global  
 181 model prediction; the black lines show prediction for each participant.



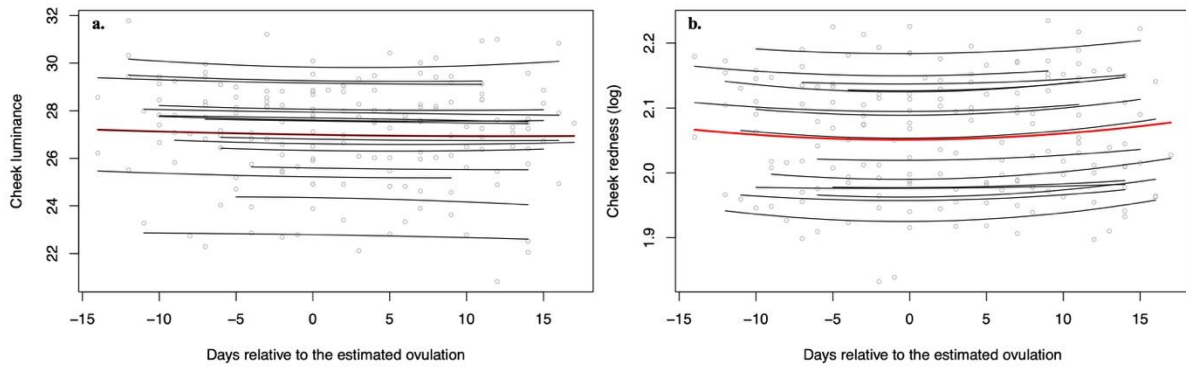

182

183

184 **Figure 2.** Relationship between lip (a) luminance and (b) redness and the days relative to the

185 estimated ovulation. Raw data are presented as grey circle. The red line presents the global

186 model prediction; the black lines show prediction for each participant.

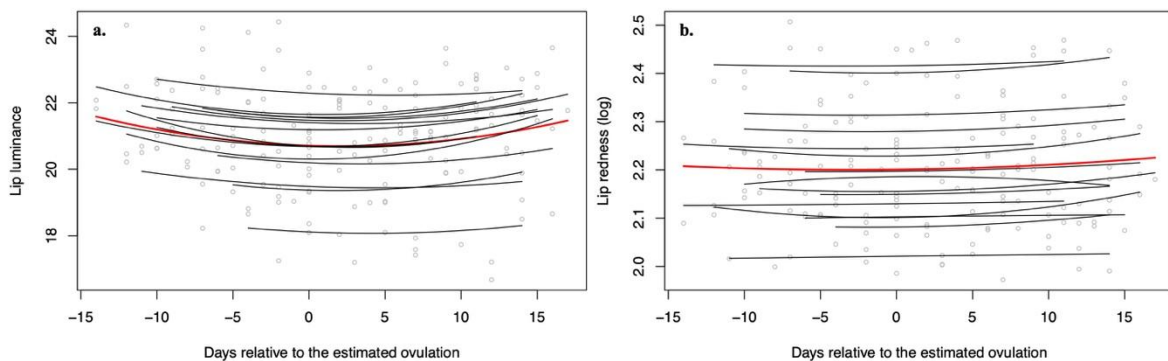

187

188

## 189 Discussion

190 Using objective methods to analyse fine-scale and intra-individual changes in cheek and lips

191 colour according to the timing of ovulation, I found that lip luminance contains information

192 about the timing of ovulation in women. Cheek colour may not be related to the timing of

193 ovulation in agreement with a previous study [21].

194 Different facial features may respond differently to variation in the probability of

195 ovulation. Intra-cycle variation in colour may be less cryptic for the lip skin as a result of its

196 higher vascularization and the finer cellular layers [38] or due to tissue-specific differences in

197 oestrogen receptor expression or sensitivity. The latter has been already suggested to explain  
198 the differential effect of cycle phase on facial and hindquarters colour in Japanese macaques  
199 [13]. Further studies on tissue-specific expression and sensitivity of oestrogen receptors would  
200 help to clarify this question. It is also possible that hormonal contraceptives have on-going and  
201 long-term effect on red skin colour (e.g., female odours [39,40]), a question that I could not  
202 assess in the present study and requires further investigation. Alternatively, colour changes in  
203 the facial skin may be more condition-dependent and related to individual health thus masking  
204 a potential cycle effect [15,16,41].

205         So, can lip colour act as an ovulatory signal? The present study suggest that lip colour  
206 contains information about the timing of ovulation. To determine whether this information is  
207 conveyed, further studies should assess men and women responses toward intra-cycle variation  
208 in lip colour to determine whether these changes are perceptible. However, caution should be  
209 used when designing such experiments. Studies should use an intra-individual design, i.e., using  
210 individual pictures rather than pictures from different participants or composite stimuli, as the  
211 differences in skin colour appeared to be relatively greater between than within participant in  
212 the present study. Studies should also collect and test multiple samples per individual in order  
213 to detect fine-scale variation, and confirm ovulation using hormonal data or ovulation detection  
214 kit. Such experimental design should reduce the risk of over- or under-estimating a potential  
215 cycle effect. However, whether variation in this trait is detectable under “optimal” conditions,  
216 i.e., artificial environments and controlled settings, does not necessarily entail consequences on  
217 human sexual communication and mate preferences since laboratory studies can have low  
218 ecological validity. At best, studies on perception could provide further evidence that lip and/or  
219 cheek colour has the potential to play a role in ovulatory signalling.

220         Humans may have inherited the biological bases for female red skin colour and sexual  
221 signalling from a primate ancestor. Female red skin colour has been suggested to play a role

222 into the sexual communication of some primate species, i.e., signalling [9–11] or concealing  
223 ovulation [13], advertising pregnancy [9,12]. The differences in red skin traits (face, lips, and  
224 sexual skin) and signalling functions probably result from the different socio-environmental  
225 constraints on mating across species. Concealing the reproductive status may have evolved in  
226 species facing higher male monopolization or pair-bonding, lower intra-sexual competition, and  
227 higher costs on signalling; while higher infanticide risks and intra-sexual competition, limited  
228 mating opportunities, and lower costs on signalling may have favoured exaggerated or  
229 multimodal signalling [42,43]. However, these proposed effects do not appear to fully explain  
230 the inter-species differences observed in female red skin colour function, as species with similar  
231 socio-ecology express traits that may be involved in either ovulatory signalling or concealing  
232 (e.g. [11,13]). More studies using longitudinal and ecologically valid designs are needed to  
233 better understand the possible evolutionary pathways and underlying mechanisms leading to  
234 the evolution of female red skin colour in primate species including humans.

235  
236 **Acknowledgments**

237 I acknowledge the Human Research Ethics Committee of Kyoto University Primate Research  
238 Institute for permission to conduct my research. I would like to sincerely thank C. Neumann  
239 for his insightful comments on the study and his valuable advice with statistical analyses, J.  
240 Duboscq and C. Garcia for comments on an earlier version of the manuscript, and K. Mouri for  
241 her general support in the lab.

242  
243 **Funding**

244 LR is funded by the Japanese Society for the Promotion of Science (project 18H05810 JSPS).

## 245 References

- 246 1. Galef BG. 1983 Costs and Benefits of Mammalian Reproduction. In *Symbiosis in*  
247 *Parent-Offspring Interactions* (eds LA Rosenblum, H Moltz), pp. 249–278. Boston, MA:  
248 Springer US. (doi:10.1007/978-1-4684-4565-7\_11)
- 249 2. Gittleman JL, Thompson SD. 1988 Energy Allocation in Mammalian Reproduction.  
250 *Integr Comp Biol* **28**, 863–875. (doi:10.1093/icb/28.3.863)
- 251 3. Campbell C. 2007 Primate sexuality and reproduction. In *Primates in perspective*, pp.  
252 423–437. New York: Campbell CJ, Fuentes A, MacKinnon KC, Panger M, Bearder SK.
- 253 4. Dixson AF. 2012 *Primate sexuality: comparative studies of the prosimians, monkeys,*  
254 *apes and human beings. 2nd edition.* Oxford University Press. New York.
- 255 5. Rhodes L, Argersinger ME, Gantert LT, Friscino BH, Hom G, Pikounis B, Hess DL,  
256 Rhodes WL. 1997 Effects of administration of testosterone, dihydrotestosterone, oestrogen  
257 and fadrozole, an aromatase inhibitor, on sex skin colour in intact male rhesus macaques.  
258 *Journal of Reproduction and Fertility* **111**, 51–57. (doi:10.1530/jrf.0.1110051)
- 259 6. Thornton MJ. 2002 The biological actions of estrogens on skin. *Experimental*  
260 *Dermatology* **11**, 487–502. (doi:10.1034/j.1600-0625.2002.110601.x)
- 261 7. Pelletier G, Ren L. 2004 Localization of sex steroid receptors in human skin. *Histol.*  
262 *Histopathol.* **19**, 629–636. (doi:10.14670/HH-19.629)
- 263 8. Thornton Mj, Taylor AH, Mulligan K, Al-Azzawi F, Lyon CC, O’Driscoll J,  
264 Messenger AG. 2003 The Distribution of Estrogen Receptor  $\beta$  Is Distinct to That of Estrogen  
265 Receptor  $\alpha$  and the Androgen Receptor in Human Skin and the Pilosebaceous Unit. *Journal of*  
266 *Investigative Dermatology Symposium Proceedings* **8**, 100–103. (doi:10.1046/j.1523-  
267 1747.2003.12181.x)
- 268 9. Setchell JM, Wickings EJ, Knapp LA. 2006 Signal content of red facial coloration in  
269 female mandrills (*Mandrillus sphinx*). *Proceedings of the Royal Society B: Biological*  
270 *Sciences* **273**, 2395–2400. (doi:10.1098/rspb.2006.3573)
- 271 10. Dubuc C, Brent LNJ, Accamando AK, Gerald MS, MacLarnon A, Semple S,  
272 Heistermann M, Engelhardt A. 2009 Sexual skin color contains information about the timing  
273 of the fertile phase in free-ranging *Macaca mulatta*. *International Journal of Primatology* **30**,  
274 777–789. (doi:10.1007/s10764-009-9369-7)
- 275 11. Higham JP, Brent LNJ, Dubuc C, Accamando AK, Engelhardt A, Gerald MS,  
276 Heistermann M, Stevens M. 2010 Color signal information content and the eye of the  
277 beholder: a case study in the rhesus macaque. *Behavioral Ecology* **21**, 739–746.  
278 (doi:10.1093/beheco/arq047)
- 279 12. Rigaille L, MacIntosh AJJ, Higham JP, Winters S, Shimizu K, Mouri K, Furuichi T,  
280 Garcia C. 2015 Multimodal advertisement of pregnancy in free-ranging female Japanese  
281 macaques (*Macaca fuscata*). *PLOS ONE* **10**, e0135127. (doi:10.1371/journal.pone.0135127)
- 282 13. Rigaille L, Higham JP, Winters S, Garcia C. 2019 The redder the better? Information  
283 content of red skin coloration in female Japanese macaques. *Behavioral Ecology and*  
284 *Sociobiology* **73**, 103. (doi:10.1007/s00265-019-2712-x)
- 285 14. Higham JP, Winters S. 2015 Color and mate choice in non-human animals. In  
286 *Handbook of Color Psychology*, pp. 502–530. Cambridge: A. Elliot, M. Fairchild, & A.  
287 Franklin.
- 288 15. Re DE, Whitehead RD, Xiao D, Perrett DI. 2011 Oxygenated-Blood Colour Change  
289 Thresholds for Perceived Facial Redness, Health, and Attractiveness. *PLOS ONE* **6**, e17859.  
290 (doi:10.1371/journal.pone.0017859)
- 291 16. Pazda AD, Thorstenson CA, Elliot AJ, Perrett DI. 2016 Women’s Facial Redness  
292 Increases Their Perceived Attractiveness: Mediation Through Perceived Healthiness.  
293 *Perception* **45**, 739–754. (doi:10.1177/0301006616633386)

- 294 17. Young SG. 2015 The effect of red on male perceptions of female attractiveness:  
295 Moderation by baseline attractiveness of female faces. *European Journal of Social*  
296 *Psychology* **45**, 146–151. (doi:10.1002/ejsp.2098)
- 297 18. Stephen ID, McKeegan AM. 2010 Lip colour affects perceived sex typicality and  
298 attractiveness of human faces. *Perception* **39**, 1104–1110. (doi:10.1068/p6730)
- 299 19. Oberzaucher E, Katina S, Schmehl SF, Holzleitner IJ, Mehu-Blantar I, Grammer K.  
300 2012 The myth of hidden ovulation: Shape and texture changes in the face during the  
301 menstrual cycle. *Journal of Evolutionary Psychology* **10**, 163–175.  
302 (doi:10.1556/JEP.10.2012.4.1)
- 303 20. Samson N, Fink B, Matts P. 2011 Does a woman's skin color indicate her fertility  
304 level? Preliminary findings. *Swiss Journal of Psychology* **70**, 199–202. (doi:10.1024/1421-  
305 0185/a000057)
- 306 21. Burriss RP, Troscianko J, Lovell PG, Fulford AJC, Stevens M, Quigley R, Payne J,  
307 Saxton TK, Rowland HM. 2015 Changes in Women's Facial Skin Color over the Ovulatory  
308 Cycle are Not Detectable by the Human Visual System. *PLOS ONE* **10**, e0130093.  
309 (doi:10.1371/journal.pone.0130093)
- 310 22. Rowland HM, Burriss RP. 2017 Human colour in mate choice and competition.  
311 *Philosophical Transactions of the Royal Society B: Biological Sciences* **372**.  
312 (doi:10.1098/rstb.2016.0350)
- 313 23. White T, Dalrymple R, Noble D, O'Hanlon J, Zurek D, Umbers K. 2015 Reproducible  
314 research in the study of biological coloration. *Faculty of Science, Medicine and Health -*  
315 *Papers* , 51–57. (doi:10.1016/j.anbehav.2015.05.007)
- 316 24. Bergman TJ, Beehner JC. 2008 A simple method for measuring colour in wild  
317 animals: validation and use on chest patch colour in geladas (*Theropithecus gelada*).  
318 *Biological Journal of the Linnean Society* **94**, 231–240. (doi:10.1111/j.1095-  
319 8312.2008.00981.x)
- 320 25. Stevens M, Stoddard MC, Higham JP. 2009 Studying primate color: towards visual  
321 system-dependent methods. *International Journal of Primatology* **30**, 893–917.  
322 (doi:10.1007/s10764-009-9356-z)
- 323 26. Hodges JK, Heistermann M. 2011 Field endocrinology: monitoring hormonal changes  
324 in free-ranging primates. In *Field and laboratory methods in primatology: a practical guide*,  
325 Joanna M. Setchell and Deborah J. Curtis.
- 326 27. Bao AM, Liu RY, Someren E van, Hofman MA, Cao YX, Zhou JN. 2003 Diurnal  
327 rhythm of free estradiol during the menstrual cycle. *European Journal of Endocrinology* **148**,  
328 227–232. (doi:10.1530/eje.0.1480227)
- 329 28. Hahn AC, Whitehead RD, Albrecht M, Lefevre CE, Perrett DI. 2012 Hot or not?  
330 Thermal reactions to social contact. *Biology Letters* , rsbl20120338.  
331 (doi:10.1098/rsbl.2012.0338)
- 332 29. Třebický V, Fialová J, Kleisner K, Havlíček J. 2016 Focal Length Affects Depicted  
333 Shape and Perception of Facial Images. *PLOS ONE* **11**, e0149313.  
334 (doi:10.1371/journal.pone.0149313)
- 335 30. Vorobyev M, Gumbert A, Kunze J, Giurfa M, Menzel R. 1997 Flowers Through  
336 Insect Eyes. *Israel Journal of Plant Sciences* **45**, 93–101.  
337 (doi:10.1080/07929978.1997.10676676)
- 338 31. Bates D, Mächler M, Bolker B, Walker S. 2015 Fitting linear mixed-effects models  
339 using lme4. *Journal of Statistical Software* **67**. (doi:10.18637/jss.v067.i01)
- 340 32. Kuznetsova A, Brockhoff PB, Christensen RHB. 2017 lmerTest Package: Tests in  
341 Linear Mixed Effects Models. *Journal of Statistical Software* **82**, 1–26.  
342 (doi:10.18637/jss.v082.i13)
- 343 33. R Core Team. 2019 R: A language and environment for statistical computing. See

- 344 <https://www.R-project.org/>.
- 345 34. Harrison XA, Donaldson L, Correa-Cano ME, Evans J, Fisher DN, Goodwin CED,  
346 Robinson BS, Hodgson DJ, Inger R. 2018 A brief introduction to mixed effects modelling and  
347 multi-model inference in ecology. *PeerJ* **6**, e4794. (doi:10.7717/peerj.4794)
- 348 35. Burnham KP, Anderson DR, Huyvaert KP. 2011 AIC model selection and multimodel  
349 inference in behavioral ecology: some background, observations, and comparisons. *Behav*  
350 *Ecol Sociobiol* **65**, 23–35. (doi:10.1007/s00265-010-1029-6)
- 351 36. Symonds MRE, Moussalli A. 2011 A brief guide to model selection, multimodel  
352 inference and model averaging in behavioural ecology using Akaike’s information criterion.  
353 *Behav Ecol Sociobiol* **65**, 13–21. (doi:10.1007/s00265-010-1037-6)
- 354 37. Bartoń K. 2017 MuMIn: Multi-Model Inference. R package version 1.40.0.
- 355 38. Crouzet C, Fournier H, Papon X, Hentati N, Cronier P, Mercier Ph. 1998 Anatomy of  
356 the arterial vascularization of the lips. *Surgical and Radiologic Anatomy* **20**, 273–278.  
357 (doi:10.1007/BF01628490)
- 358 39. Crawford JC, Boulet M, Drea CM. 2010 Smelling wrong: hormonal contraception in  
359 lemurs alters critical female odour cues. *Proceedings of the Royal Society of London B:*  
360 *Biological Sciences* , rspb20101203. (doi:10.1098/rspb.2010.1203)
- 361 40. Kuukasjärvi S, Eriksson CJP, Koskela E, Mappes T, Nissinen K, Rantala MJ. 2004  
362 Attractiveness of women’s body odors over the menstrual cycle: the role of oral  
363 contraceptives and receiver sex. *Behavioral Ecology* **15**, 579–584.  
364 (doi:10.1093/beheco/arh050)
- 365 41. Thorstenson CA, Pazda AD, Elliot AJ, Perrett DI. 2017 Facial Redness Increases  
366 Men’s Perceived Healthiness and Attractiveness. *Perception* **46**, 650–664.  
367 (doi:10.1177/0301006616680124)
- 368 42. Rooker K, Gavrillets S. 2018 On the evolution of visual female sexual signalling.  
369 *Proceedings of the Royal Society B: Biological Sciences* **285**, 20172875.  
370 (doi:10.1098/rspb.2017.2875)
- 371 43. Fitzpatrick CL, Servedio MR. 2018 The evolution of male mate choice and female  
372 ornamentation: a review of mathematical models. *Curr Zool* **64**, 323–333.  
373 (doi:10.1093/cz/zoy029)
- 374
